# Supplementary material
Source: PubMed Central journal article supplement (PMC3583502)
Supplement: supp_112.201111_JPET201111_Supplemental_Data.pdf [file supp_112.201111_JPET201111_Supplemental_Data.pdf]

## **SUPPLEMENTAL DATA**

**Title:** Identification of Stanniocalcin 2 as a Novel Aryl Hydrocarbon Receptor Target Gene

**Authors:** Tod A Harper Jr., Aditya D. Joshi, Cornelis J. Elferink

**Journal:** The Journal of Pharmacology and Experimental Therapeutics – JPET

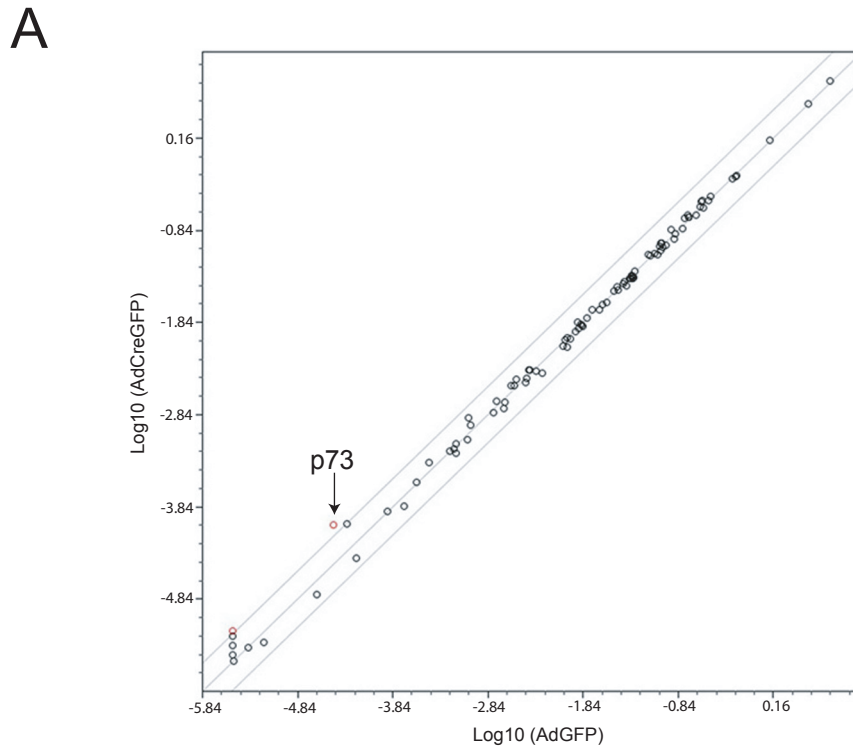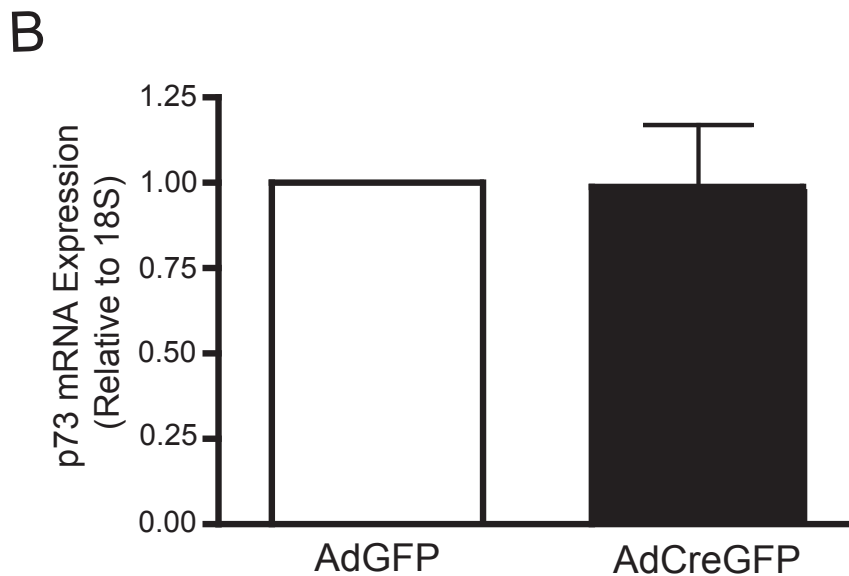

**Supplemental Figure 1.** The loss of AhR protein does not alter expression of 84 well-defined apoptotic genes.  
**A.** AhRfx/fx primary hepatocytes were infected with AdGFP or AdCreGFP for 24 hours. Total RNA was prepared for use in SABiosciences Mouse Apoptosis RT<sup>2</sup> Profiler PCR Array as described in the Materials and Methods. Individual transcripts (open circles) in the array are plotted as a function of their expression in AdGFP and AdCreGFP infected cells. Unchanged transcripts lie along the central diagonal line. The outer lines denote 2-fold changes in expression. The array was performed in triplicate using 3 biologically independent RNA preparations. The arrow identifies p73.  
**B.** qRT-PCR was performed on the RNA to verify p73 expression independently. The data represents the mean  $\pm$  S.E.M. of three independent experiments. p73 mRNA expression was normalized to ribosomal RNA 18S.

Supplemental Table 1

|                | ProbeSet ID  | Accession#   | Gene Symbol   | Fold Change<br>(Microarray) | p-value<br>(Microarray) | Fold Change<br>(qRT-PCR) | p-value<br>(qRT-PCR) |
|----------------|--------------|--------------|---------------|-----------------------------|-------------------------|--------------------------|----------------------|
| <b>12 Hour</b> | 1422565_s_at | NM_008688    | Nfic          | -1.46                       | 0.0377478               | -1.316                   | ND <sup>1</sup>      |
|                | 1452074_at   | NM_028343    | Tmem135       | -1.41                       | 0.0439033               | -1.074                   | ND                   |
|                | 1455645_at   | NM_175418    | 8030451F13Rik | -1.36                       | 0.0197448               | -1.4109                  | 0.705204             |
|                | 1452395_at   | NM_025885    | Med19         | -1.34                       | 0.0135541               | 1.337                    | ND                   |
|                | 1431722_a_at | NM_027827    | Afmid         | -1.31                       | 0.00871236              | 1.048                    | ND                   |
|                | 1426519_at   | NM_011030    | P4ha1         | -1.3                        | 0.00165891              | -1.09                    | ND                   |
|                | 1428865_at   | NM_029410    | Bcl2l12       | -1.29                       | 0.015628                | -1.437                   | ND                   |
|                | 1415957_a_at | NM_010925    | Rrp1          | -1.28                       | 0.0477517               | 30.1258                  | 0.073179             |
|                | 1440915_at   | NM_001081323 | Mphosph9      | -1.15                       | 0.038924                | -1.181                   | ND                   |
|                | 1447675_x_at | NM_010866    | Myod1         | -1.12                       | 0.0187223               | -1.2997                  | 0.735987             |
|                | 1443244_at   | NM_029880    | Ptgr2         | 1.15                        | 0.0433498               | -1.2532                  | 0.589443             |
|                | 1447659_x_at | NM_133826    | Atp6v1h       | 1.15                        | 0.00132547              | -1.7491                  | 0.758352             |
|                | 1448070_at   | NM_001035226 | Xpo1          | 1.15                        | 0.00319851              | -1.2935                  | 0.338644             |
|                | 1458441_at   | NM_172271    | Slc6a17       | 1.15                        | 0.013995                | -3.4553                  | 0.152444             |
|                | 1419526_at   | NM_010208    | Fgr           | 1.15                        | 0.0118045               | -6.8066                  | 0.184597             |
|                | 1453495_at   | NM_027097    | Klk12         | 1.15                        | 0.0519622               | -4.3943                  | 0.456866             |
|                | 1443244_at   | NM_029880    | Ptgr2         | 1.15                        | 0.0433498               | 1.273                    | ND                   |
|                | 1457724_at   | NM_009984    | Ctsl          | 1.15                        | 0.0277524               | 1.016                    | ND                   |
|                | 1450912_at   | NM_007641    | Ms4a1         | 1.15                        | 0.0453903               | -2.768                   | ND                   |
|                | 1416434_at   | NM_013479    | Bcl2l10       | 1.16                        | 0.023027                | 2.0216                   | 0.594844             |
|                | 1442149_at   | NM_172443    | Tbc1d16       | 1.17                        | 0.019704                | -1.2495                  | 0.614209             |
|                | 1443903_at   | NM_008910    | Ppm1a         | 1.17                        | 0.0378589               | 1.0119                   | 0.727244             |
|                | 1432439_at   | NM_027264    | Zfp715        | 1.18                        | 0.0130613               | -2.0477                  | 0.478696             |
|                | 1427291_at   | NM_011516    | Sycp1         | 1.18                        | 0.0593509               | -7.521                   | ND                   |
|                | 1457240_at   | NM_130860    | Cdk9          | 1.19                        | 0.0478827               | -1.045                   | ND                   |
|                | 1430936_at   | NM_134078    | Chmp7         | 1.2                         | 0.0185533               | 1.0179                   | 0.806008             |
|                | 1418263_at   | NM_013932    | Ddx25         | 1.22                        | 0.0199518               | 1.1761                   | 0.922095             |
|                | 1442417_at   | NM_020000    | Med8          | 1.22                        | 0.00702729              | -1.3303                  | 0.843149             |
|                | 1445861_at   | NM_013918    | Usp25         | 1.22                        | 0.0449911               | -1.3338                  | 0.275507             |
|                | 1426512_at   | NM_153157    | Olfm3         | 1.23                        | 0.0202879               | 2.252                    | ND                   |

<sup>1</sup> ND, not determined due to insufficient sample size

Supplemental Table 1

|                | ProbeSet ID  | Accession#   | Gene Symbol | Fold Change<br>(Microarray) | p-value<br>(Microarray) | Fold Change<br>(qRT-PCR) | p-value<br>(qRT-PCR) |
|----------------|--------------|--------------|-------------|-----------------------------|-------------------------|--------------------------|----------------------|
| <b>12 Hour</b> | 1456033_at   | NM_011536    | Tbx4        | 1.24                        | 0.00655649              | -2.353                   | 0.258499             |
|                | 1458922_at   | NM_177395    | Map3k9      | 1.24                        | 0.018436                | -2.83                    | ND                   |
|                | 1446477_at   | NM_144523    | Zfp622      | 1.25                        | 0.00508075              | -1.1233                  | 0.693553             |
|                | 1423824_at   | NM_026582    | Gpr177      | 1.25                        | 0.0584336               | -1.139                   | ND                   |
|                | 1445543_at   | NM_144842    | Zmym5       | 1.26                        | 0.00119374              | -1.2485                  | 0.676999             |
|                | 1446315_at   | NM_134037    | Acly        | 1.26                        | 0.00670916              | -1.1031                  | 0.942234             |
|                | 1450211_at   | NM_053011    | Lrp1b       | 1.26                        | 0.0178174               | -5.0425                  | 0.206188             |
|                | 1458111_at   | NM_145413    | Fam20b      | 1.27                        | 0.0293357               | -1.034                   | ND                   |
|                | 1446448_at   | NM_019663    | Pias1       | 1.28                        | 0.0198857               | -1.1597                  | 0.794687             |
|                | 1420402_at   | NM_001036684 | Atp2b2      | 1.28                        | 0.0402428               | -1.274                   | ND                   |
|                | 1441631_at   | NM_020494    | Ddx24       | 1.28                        | 0.0469727               | -1.466                   | ND                   |
|                | 1416618_at   | NM_008911    | Ppox        | 1.29                        | 0.0132195               | -1.0092                  | 0.809206             |
|                | 1447243_at   | XM_001476619 | BC040756    | 1.29                        | 0.0153648               | -1.3757                  | 0.703501             |
|                | 1439569_at   | NM_010287    | Gpr83       | 1.3                         | 0.00709981              | -1.0988                  | 0.66427              |
|                | 1449729_at   | NM_010202    | Fgf4        | 1.3                         | 0.024994                | -1.628                   | ND                   |
|                | 1456967_at   | NM_181853    | Trim66      | 1.3                         | 0.0313985               | -4.491                   | ND                   |
|                | 1438493_at   | NM_183139    | Pld6        | 1.32                        | 0.015361                | -1.299                   | ND                   |
|                | 1447828_x_at | NM_026189    | Eepd1       | 1.33                        | 0.0275309               | -1.2962                  | 0.940483             |
|                | 1446750_at   | NM_008378    | Impact      | 1.33                        | 0.0167558               | 1.154                    | ND                   |
|                | 1454970_at   | NM_001008705 | Bud31       | 1.35                        | 0.0328001               | -1.611                   | ND                   |
|                | 1445091_at   | NM_019864    | Atr         | 1.39                        | 0.0372469               | -1.19                    | ND                   |
|                | 1452104_at   | NM_197995    | Arl16       | 1.39                        | 0.0172165               | 68.938                   | ND                   |
|                | 1427606_at   | NM_019461    | Usp27x      | 1.4                         | 0.0018845               | -1.0392                  | 0.634207             |
|                | 1445798_at   | NM_007862    | Dlg1        | 1.42                        | 0.0439951               | -1.2559                  | 0.472463             |
|                | 1431231_at   | NM_013548    | Hist1h3f    | 1.45                        | 0.00653143              | -3.6214                  | 0.724804             |
|                | 1439345_at   | NM_053110    | Gpnmb       | 1.46                        | 0.000873131             | 1.2445                   | 0.521103             |
|                | 1439626_at   | NM_016963    | Tmod3       | 1.6                         | 0.0443229               | -1.496                   | ND                   |
|                | 1442426_at   | NM_001004436 | Wapal       | 1.6                         | 0.0596994               | 1.088                    | ND                   |
|                | 1440764_at   | NM_009703    | Araf        | 1.6                         | 0.0330434               | 1.091                    | ND                   |

Supplemental Table 1

|                | ProbeSet ID         | Accession#          | Gene Symbol    | Fold Change<br>(Microarray) | p-value<br>(Microarray) | Fold Change<br>(qRT-PCR) | p-value<br>(qRT-PCR) |
|----------------|---------------------|---------------------|----------------|-----------------------------|-------------------------|--------------------------|----------------------|
| <b>12 Hour</b> | 1436769_at          | NM_011965           | Psma1          | 1.67                        | 0.0364339               | -1.41                    | ND                   |
| <b>24 Hour</b> | <b>1422535_at</b>   | <b>NM_001037134</b> | <b>Ccne2</b>   | <b>-2.3</b>                 | <b>0.00556455</b>       | <b>-2.3069</b>           | <b>0.04303*</b>      |
|                | 1447640_s_at        | NM_016768           | Pbx3           | -2.22                       | 0.019032                | 1.496                    | ND                   |
|                | 1437187_at          | NM_178609           | E2f7           | -2.21                       | 0.0149549               | 1.6182                   | 0.016985             |
|                | <b>1454878_at</b>   | <b>NM_001110017</b> | <b>Dzip3</b>   | <b>-1.83</b>                | <b>7.54E-04</b>         | <b>-2.4505</b>           | <b>0.008996</b>      |
|                | <b>1429499_at</b>   | <b>NM_025995</b>    | <b>Fbxo5</b>   | <b>-1.82</b>                | <b>0.0420618</b>        | <b>-2.4155</b>           | <b>0.034343</b>      |
|                | 1416680_at          | NM_001033962        | Ube3a          | -1.79                       | 0.0499803               | -1.361                   | ND                   |
|                | <b>1424020_at</b>   | <b>NM_022989</b>    | <b>Arl6ip6</b> | <b>-1.78</b>                | <b>0.00254829</b>       | <b>-1.3932</b>           | <b>0.044794</b>      |
|                | <b>1454952_s_at</b> | <b>NM_178113</b>    | <b>Ncapd3</b>  | <b>-1.78</b>                | <b>0.00658319</b>       | <b>-2.2623</b>           | <b>0.005212</b>      |
|                | 1456280_at          | NM_175554           | Clspn          | -1.74                       | 0.00693641              | -3.4987                  | 0.118735             |
|                | <b>1428900_s_at</b> | <b>NM_029790</b>    | <b>Mett5d1</b> | <b>-1.69</b>                | <b>0.0584134</b>        | <b>-2.6575</b>           | <b>0.021048</b>      |
|                | 1417760_at          | NM_007430           | Nr0b1          | -1.68                       | 0.0052307               | 1.2014                   | 0.275835             |
|                | <b>1453592_at</b>   | <b>NM_027321</b>    | <b>Lrrc39</b>  | <b>-1.64</b>                | <b>0.0387068</b>        | <b>-2.412</b>            | <b>0.026505</b>      |
|                | <b>1424410_at</b>   | <b>NM_029553</b>    | <b>Ttc8</b>    | <b>-1.62</b>                | <b>0.0370323</b>        | <b>-2.2198</b>           | <b>0.030252</b>      |
|                | <b>1452654_at</b>   | <b>NM_178395</b>    | <b>Zdhhc2</b>  | <b>-1.58</b>                | <b>0.0101698</b>        | <b>-2.0041</b>           | <b>0.001076</b>      |
|                | <b>1423577_at</b>   | <b>NM_134071</b>    | <b>Ankrd32</b> | <b>-1.58</b>                | <b>0.0216935</b>        | <b>-3.002</b>            | <b>0.031489</b>      |
|                | 1427566_at          | NM_001100454        | Wfikkn1        | -1.58                       | 0.0545651               | 1.4215                   | 0.330086             |
|                | 1427670_a_at        | NM_011544           | Tcf12          | -1.57                       | 0.00977476              | -2.2461                  | 0.114768             |
|                | <b>1456359_at</b>   | <b>NM_172807</b>    | <b>Ppwd1</b>   | <b>-1.56</b>                | <b>0.0137773</b>        | <b>-1.6603</b>           | <b>0.030693</b>      |
|                | <b>1448379_at</b>   | <b>NM_133931</b>    | <b>Pot1a</b>   | <b>-1.56</b>                | <b>0.0129491</b>        | <b>-2.4448</b>           | <b>0.055646</b>      |
|                | 1421473_at          | NM_010554           | Il1a           | -1.56                       | 0.0311228               | -5.982                   | ND                   |
|                | 1418969_at          | NM_013787           | Skp2           | -1.55                       | 0.0217402               | -1.4395                  | 0.180132             |
|                | 1433946_at          | NM_009577           | Zik1           | -1.55                       | 0.00256565              | 2.0906                   | 0.101837             |
|                | 1433946_at          | NM_009577           | Zik1           | -1.55                       | 0.00256565              | 1.022                    | ND                   |
|                | <b>1455724_at</b>   | <b>NM_027322</b>    | <b>Prrg1</b>   | <b>-1.52</b>                | <b>0.00618626</b>       | <b>-2.3544</b>           | <b>0.022508</b>      |
|                | 1440226_at          | NM_001008501        | Zfp760         | -1.52                       | 4.76E-03                | -1.3037                  | 0.569754             |
|                | 1434682_at          | NM_175466           | Zfp770         | -1.52                       | 0.0047638               | 1.598                    | ND                   |
|                | <b>1429313_at</b>   | <b>NM_013845</b>    | <b>Ror1</b>    | <b>-1.51</b>                | <b>0.00499191</b>       | <b>-3.3444</b>           | <b>0.04543</b>       |
|                | <b>1429129_at</b>   | <b>NM_028915</b>    | <b>Lrrcc1</b>  | <b>-1.5</b>                 | <b>0.017268</b>         | <b>-3.2006</b>           | <b>0.001882</b>      |
|                | <b>1456485_at</b>   | <b>NM_001081152</b> | <b>Npat</b>    | <b>-1.5</b>                 | <b>0.0212934</b>        | <b>-2.0647</b>           | <b>0.004807</b>      |

\* Bold font indicates statistical significance in both the microarray and qRTPCR validation

Supplemental Table 1

|                | ProbeSet ID         | Accession#       | Gene Symbol          | Fold Change<br>(Microarray) | p-value<br>(Microarray) | Fold Change<br>(qRT-PCR) | p-value<br>(qRT-PCR) |
|----------------|---------------------|------------------|----------------------|-----------------------------|-------------------------|--------------------------|----------------------|
| <b>24 Hour</b> | <b>1423990_at</b>   | <b>NM_027295</b> | <b>Rab28</b>         | <b>-1.47</b>                | <b>0.0226515</b>        | <b>-2.1636</b>           | <b>0.023441</b>      |
|                | 1416492_at          | NM_007633        | Ccne1                | -1.47                       | 0.0157672               | 2.047                    | ND                   |
|                | <b>1421866_at</b>   | <b>NM_008173</b> | <b>Nr3c1</b>         | <b>-1.46</b>                | <b>0.0248413</b>        | <b>-1.5194</b>           | <b>0.00196</b>       |
|                | <b>1424072_at</b>   | <b>NM_027251</b> | <b>2010107G23Rik</b> | <b>-1.46</b>                | <b>0.00994554</b>       | <b>-2.4089</b>           | <b>0.012763</b>      |
|                | 1431422_a_at        | NM_019819        | Dusp14               | -1.46                       | 0.0123517               | 1.7395                   | 0.043968             |
|                | 1453327_at          | NM_029393        | Krt24                | -1.46                       | 0.0214941               | 3.128                    | ND                   |
|                | 1428667_at          | NM_173740        | Maoa                 | -1.44                       | 0.010504                | -2.5298                  | 0.114411             |
|                | 1427031_s_at        | NM_144550        | Ccdc52               | -1.44                       | 0.00639036              | -1.7552                  | 0.011657             |
|                | 1420527_s_at        | NM_001013832     | Gpr31c               | -1.44                       | 0.018871                | -1.0564                  | 0.96883              |
|                | 1422125_at          | NM_008311        | Htr2b                | -1.43                       | 0.0402935               | -2.0297                  | 0.174259             |
|                | 1449891_a_at        | NM_028523        | Dcbld2               | -1.42                       | 0.0207998               | -2.9245                  | 0.078322             |
|                | 1448701_a_at        | NM_030675        | Krit1                | -1.41                       | 0.0125251               | -1.5119                  | 0.067973             |
|                | <b>1452276_at</b>   | <b>NM_007958</b> | <b>Smarcad1</b>      | <b>-1.41</b>                | <b>0.0016967</b>        | <b>-1.5881</b>           | <b>0.038549</b>      |
|                | 1451503_at          | NM_030152        | Nol3                 | -1.41                       | 0.0170388               | 1.1021                   | 0.741342             |
|                | 1417837_at          | NM_009434        | Phlda2               | -1.4                        | 0.0437577               | 1.0085                   | 0.934224             |
|                | 1431777_a_at        | NM_026122        | Hmgn3                | -1.39                       | 0.0482411               | 1.8419                   | 0.014224             |
|                | 1436309_at          | NM_001081324     | Neto2                | -1.39                       | 0.0492571               | 2.3922                   | 0.034079             |
|                | <b>1448429_at</b>   | <b>NM_013755</b> | <b>Gyg</b>           | <b>-1.39</b>                | <b>0.00445538</b>       | <b>-1.7075</b>           | <b>0.002374</b>      |
|                | <b>1452210_at</b>   | <b>NM_177372</b> | <b>Dna2</b>          | <b>-1.39</b>                | <b>0.0345378</b>        | <b>-1.9635</b>           | <b>0.041862</b>      |
|                | 1423421_at          | NM_019683        | Ankrd49              | -1.39                       | 0.0134246               | -1.0631                  | 0.737063             |
|                | <b>1451175_at</b>   | <b>NM_029701</b> | <b>Spcs3</b>         | <b>-1.38</b>                | <b>0.0372038</b>        | <b>-1.6958</b>           | <b>0.032139</b>      |
|                | <b>1431921_a_at</b> | <b>NM_009282</b> | <b>Stag1</b>         | <b>-1.37</b>                | <b>0.0216641</b>        | <b>-2.5963</b>           | <b>0.016583</b>      |
|                | <b>1420507_a_at</b> | <b>NM_026075</b> | <b>Sfrs12ip1</b>     | <b>-1.35</b>                | <b>0.0149634</b>        | <b>-1.9565</b>           | <b>0.054464</b>      |
|                | 1428103_at          | NM_007399        | Adam10               | -1.35                       | 0.0145373               | -1.6489                  | 0.174337             |
|                | <b>1448638_at</b>   | <b>NM_134092</b> | <b>Mtbp</b>          | <b>-1.35</b>                | <b>0.00715986</b>       | <b>-1.5257</b>           | <b>0.026033</b>      |
|                | 1436543_at          | NM_153116        | Gtpbp10              | -1.35                       | 0.0013415               | -1.2764                  | 0.412355             |
|                | 1427500_at          | NM_026911        | Spcs1                | -1.34                       | 0.00472816              | -1.5759                  | 0.021898             |
|                | 1453822_at          | NM_028821        | Dnalc1               | -1.34                       | 0.0296625               | -1.259                   | 0.108904             |
|                | 1428633_at          | NM_172253        | Twistnb              | -1.34                       | 0.0164858               | -1.191                   | ND                   |
|                | 1452106_at          | NM_001029836     | Npnt                 | -1.34                       | 0.0732311               | 1.556                    | ND                   |
|                | <b>1448670_at</b>   | <b>NM_009454</b> | <b>Ube2e3</b>        | <b>-1.33</b>                | <b>0.00155413</b>       | <b>-1.6184</b>           | <b>0.040876</b>      |
|                | <b>1448828_at</b>   | <b>NM_025695</b> | <b>Smc6</b>          | <b>-1.33</b>                | <b>0.0160562</b>        | <b>-1.6449</b>           | <b>0.009969</b>      |

Supplemental Table 1

|                | ProbeSet ID         | Accession#          | Gene Symbol  | Fold Change<br>(Microarray) | p-value<br>(Microarray) | Fold Change<br>(qRT-PCR) | p-value<br>(qRT-PCR) |
|----------------|---------------------|---------------------|--------------|-----------------------------|-------------------------|--------------------------|----------------------|
| <b>24 Hour</b> | 1435390_at          | NM_027698           | Exod1        | -1.32                       | 0.00675148              | 2.0869                   | 0.344391             |
|                | 1437686_x_at        | NM_009986           | Cux1         | -1.31                       | 0.0051343               | -1.1356                  | 0.631894             |
|                | 1425493_at          | NM_009758           | Bmpr1a       | -1.3                        | 0.0062146               | -1.4118                  | 0.134251             |
|                | 1427971_at          | NM_145991           | Cdc73        | -1.3                        | 0.018011                | -1.82                    | 0.072477             |
|                | 1456577_x_at        | NM_145131           | Pitrm1       | -1.3                        | 0.0253898               | -1.095                   | ND                   |
|                | 1430500_s_at        | NM_016804           | Mtx2         | -1.29                       | 0.000437871             | -1.4603                  | 0.074679             |
|                | 1421350_a_at        | NM_028736           | Grip1        | -1.28                       | 0.0120105               | -1.9772                  | 0.130463             |
|                | 1419183_at          | NM_133905           | Papd4        | -1.28                       | 0.0530044               | -1.727                   | 0.075125             |
|                | 1426272_at          | NM_020295           | Lmbr1        | -1.28                       | 0.0156544               | -1.4361                  | 0.139956             |
|                | 1436436_at          | NM_030131           | Cnih4        | -1.28                       | 0.0107517               | -1.101                   | 0.722252             |
|                | 1452953_at          | NM_026210           | Fam18b       | -1.28                       | 0.0208046               | 1.797                    | ND                   |
|                | 1423824_at          | NM_026582           | Gpr177       | -1.27                       | 0.0582184               | -1.6654                  | 0.201232             |
|                | 1430129_a_at        | NM_178599           | Commd8       | -1.27                       | 0.00570525              | -1.2904                  | 0.132797             |
|                | 1435242_at          | NM_175310           | Pds5b        | -1.27                       | 0.0235754               | -3.1869                  | 0.168024             |
|                | 1440915_at          | NM_001081323        | Mphosph9     | -1.27                       | 0.00746927              | -5.4427                  | 0.536716             |
|                | 1456133_x_at        | NM_010580           | Itgb5        | -1.27                       | 0.0424371               | -1.1797                  | 0.48399              |
|                | 1437122_at          | NM_009741           | Bcl2         | -1.25                       | 0.0427953               | 1.3593                   | 0.011624             |
|                | 1454727_at          | NM_178928           | Afap111      | -1.25                       | 0.00789143              | 1.452                    | ND                   |
|                | 1417535_at          | NM_025785           | Fbxo25       | -1.24                       | 0.00358443              | -1.6231                  | 0.112262             |
|                | 1425495_at          | NM_001024846        | Zfp62        | -1.23                       | 0.0450192               | -1.1844                  | 0.657075             |
|                | <b>1443329_at</b>   | <b>NM_020575</b>    | <b>C3HC4</b> | <b>-1.22</b>                | <b>0.0459186</b>        | <b>-1.5203</b>           | <b>0.023587</b>      |
|                | 1418908_at          | NM_013626           | Pam          | -1.22                       | 0.00184097              | -1.7208                  | 0.146979             |
|                | 1437312_at          | NM_007560           | Bmpr1b       | -1.21                       | 0.00640859              | 1.3918                   | 0.007601             |
|                | <b>1449484_at</b>   | <b>NM_011491</b>    | <b>Stc2</b>  | <b>-1.19</b>                | <b>0.0414261</b>        | <b>-7.6243</b>           | <b>0.00075</b>       |
|                | <b>1425340_a_at</b> | <b>NM_008980</b>    | <b>Ptpra</b> | <b>-1.19</b>                | <b>0.0286731</b>        | <b>-1.7787</b>           | <b>0.029988</b>      |
|                | 1428741_at          | NM_001038698        | Elavl4       | -1.19                       | 0.0350276               | -4.5072                  | 0.062718             |
|                | <b>1439896_at</b>   | <b>NM_001034030</b> | <b>Limk2</b> | <b>-1.17</b>                | <b>0.0498148</b>        | <b>-1.9517</b>           | <b>0.001298</b>      |
|                | 1434969_at          | NM_176954           | Bruno15      | -1.13                       | 0.0493031               | 1.4878                   | 0.8925               |
|                | 1426697_a_at        | NM_013587           | Lrpap1       | 1.15                        | 0.033769                | -1.4432                  | 0.172929             |
|                | 1419472_s_at        | NM_010948           | Nudc         | 1.16                        | 0.0236997               | -1.6958                  | 0.216466             |
|                | 1440674_at          | NM_001037987        | Edil3        | 1.16                        | 0.00579451              | -5.9214                  | 0.017331             |
|                | 1419053_at          | NM_019781           | Pex14        | 1.18                        | 0.0388409               | -1.4163                  | 0.067536             |

Supplemental Table 1

|                | ProbeSet ID  | Accession#   | Gene Symbol   | Fold Change<br>(Microarray) | p-value<br>(Microarray) | Fold Change<br>(qRT-PCR) | p-value<br>(qRT-PCR) |
|----------------|--------------|--------------|---------------|-----------------------------|-------------------------|--------------------------|----------------------|
| <b>24 Hour</b> | 1430083_at   | XM_900147    | 2610307P16Rik | 1.19                        | 0.00608651              | -2.9275                  | 0.00047              |
|                | 1442199_at   | NM_001001177 | BC051142      | 1.19                        | 0.0109164               | -13.4028                 | 0.001997             |
|                | 1418270_at   | NM_013906    | Adamts8       | 1.2                         | 0.0206855               | 1.9468                   | 0.294962             |
|                | 1421247_at   | NM_011041    | Pax9          | 1.2                         | 0.0291777               | -1.2671                  | 0.297761             |
|                | 1449624_at   | NM_001033296 | Sel1l2        | 1.2                         | 0.012553                | -5.9717                  | 0.028063             |
|                | 1440251_s_at | NM_009564    | Zfp64         | 1.21                        | 0.0240486               | -1.3608                  | 0.389488             |
|                | 1422520_at   | NM_008691    | Nefm          | 1.21                        | 0.00937113              | 1.2377                   | 0.540318             |
|                | 1422669_at   | NM_019480    | Ebag9         | 1.22                        | 0.0479554               | -1.1931                  | 0.430425             |
|                | 1425937_a_at | NM_138753    | Hexim1        | 1.22                        | 0.0479554               | 1.3285                   | 0.280463             |
|                | 1422141_s_at | NM_033616    | Csprs         | 1.22                        | 0.0382522               | 1.75                     | ND                   |
|                | 1417631_at   | NM_021461    | Mknk1         | 1.23                        | 0.00727506              | -1.2577                  | 0.592406             |
|                | 1421128_at   | NM_009453    | Zrsr2         | 1.23                        | 0.0309647               | -1.3009                  | 0.297299             |
|                | 1451472_at   | NM_026140    | Ears2         | 1.23                        | 0.0552563               | -2.0082                  | 0.222458             |
|                | 1449217_at   | NM_001122978 | Casp8ap2      | 1.24                        | 0.0456902               | -1.1248                  | 0.745156             |
|                | 1455448_at   | NM_198114    | Dagla         | 1.24                        | 0.00654762              | 3.419                    | ND                   |
|                | 1416920_at   | NM_009032    | Rbm4          | 1.26                        | 0.0214421               | -1.1448                  | 0.567153             |
|                | 1424120_at   | NM_021419    | Rnf8          | 1.26                        | 0.0205861               | -1.2176                  | 0.133634             |
|                | 1437369_at   | NM_008001    | Fgd1          | 1.26                        | 0.0532073               | -2.2836                  | 0.023557             |
|                | 1416579_a_at | NM_008532    | Tacstd1       | 1.27                        | 0.00160433              | -1.0041                  | 0.902398             |
|                | 1420056_s_at | NM_033398    | Jmjd6         | 1.27                        | 0.0264347               | -1.1392                  | 0.292894             |
|                | 1426465_at   | NM_001042487 | Dlgap4        | 1.27                        | 0.00283408              | -1.1137                  | 0.687162             |
|                | 1427910_at   | NM_028623    | Cst6          | 1.27                        | 0.015732                | 196.1754                 | 0.985704             |
|                | 1417549_at   | NM_001044747 | Zfp68         | 1.27                        | 0.0255634               | -1.1519                  | 0.677596             |
|                | 1446783_at   | NM_183358    | Gadd45gip1    | 1.29                        | 0.0124439               | -1.2252                  | 0.54995              |
|                | 1419340_at   | NM_031260    | Mov10l1       | 1.29                        | 0.0231991               | -1.403                   | 0.233716             |
|                | 1429176_at   | NM_199302    | Lrsam1        | 1.29                        | 0.0135811               | -1.6621                  | 0.055289             |
|                | 1429850_x_at | NM_028070    | Alkbh4        | 1.29                        | 0.00316928              | -1.5349                  | 0.063819             |
|                | 1453412_a_at | NM_028777    | Sec14l1       | 1.3                         | 0.0200196               | 1.1105                   | 0.571274             |
|                | 1455403_at   | NM_172865    | Manea         | 1.3                         | 0.0459865               | -1.6054                  | 0.234381             |
|                | 1422243_at   | NM_008008    | Fgf7          | 1.31                        | 0.0496746               | 1.2164                   | 0.740811             |
|                | 1424907_a_at | NM_025648    | Farsa         | 1.31                        | 0.0043294               | -1.1316                  | 0.54651              |
|                | 1429140_at   | NM_029932    | Spns3         | 1.31                        | 0.0340807               | -2.2709                  | 0.042832             |



Supplemental Table 1

|                | ProbeSet ID  | Accession#   | Gene Symbol   | Fold Change<br>(Microarray) | p-value<br>(Microarray) | Fold Change<br>(qRT-PCR) | p-value<br>(qRT-PCR) |
|----------------|--------------|--------------|---------------|-----------------------------|-------------------------|--------------------------|----------------------|
| <b>24 Hour</b> | 1436269_s_at | NM_019752    | Htra2         | 1.31                        | 0.0343619               | 2.4254                   | ND                   |
|                | 1454441_at   | NM_001008238 | Bnip2         | 1.31                        | 0.0620141               | -1.5772                  | 0.000002             |
|                | 1422435_at   | NM_023333    | 2210010C04Rik | 1.32                        | 0.0278925               | -1.5133                  | 0.172405             |
|                | 1416791_a_at | NM_016813    | Nxf1          | 1.36                        | 0.00840251              | 1.5489                   | 0.259156             |
|                | 1417603_at   | NM_011066    | Per2          | 1.36                        | 0.00344548              | -1.2936                  | 0.582383             |
|                | 1437212_at   | XM_001481070 | Zfp420        | 1.36                        | 0.0315739               | -1.9784                  | 0.172254             |
|                | 1428064_at   | NM_001040111 | Arap1         | 1.37                        | 0.00602797              | 1.1278                   | 0.585955             |
|                | 1453184_at   | NM_178618    | 2310040C09Rik | 1.37                        | 0.0239767               | 1.0533                   | 0.831513             |
|                | 1417811_at   | NM_133221    | Slc24a6       | 1.37                        | 0.0598961               | -1.0139                  | 0.877839             |
|                | 1453184_at   | NM_178618    | Fam83g        | 1.37                        | 0.0239767               | 1.578                    | ND                   |
|                | 1428064_at   | NM_001040111 | Arap1         | 1.37                        | 0.00602797              | 1.105                    | ND                   |
|                | 1438904_at   | NM_173390    | Nhsl1         | 1.38                        | 0.0316195               | -1.584                   | 0.018374             |
|                | 1460438_at   | NM_028134    | Lysmd1        | 1.38                        | 0.00272478              | 1.4647                   | 0.18356              |
|                | 1426786_s_at | NM_178380    | Dhx38         | 1.4                         | 0.00451137              | -1.1957                  | 0.603455             |
|                | 1422890_at   | NM_130448    | Pcdh18        | 1.42                        | 0.050974                | -1.8683                  | 0.216253             |
|                | 1457240_at   | NM_130860    | Cdk9          | 1.42                        | 0.0302805               | -1.7686                  | 0.060803             |
|                | 1434682_at   | NM_175466    | Zfp770        | 1.42                        | 0.00914444              | -1.4346                  | 0.143049             |
|                | 1431805_a_at | NM_027897    | Rhpn2         | 1.43                        | 0.00706566              | -1.0788                  | 0.76668              |
|                | 1439190_at   | NM_028429    | Fhad1         | 1.43                        | 0.00792059              | 1.8651                   | 0.107604             |
|                | 1431805_a_at | NM_027897    | Rhpn2         | 1.43                        | 0.00706566              | 1.075                    | ND                   |
|                | 1438167_x_at | NM_146018    | Ficn          | 1.45                        | 0.0162386               | -1.0443                  | 0.86232              |
|                | 1449702_at   | NM_133349    | Zfand2a       | 1.45                        | 0.0423697               | 1.1629                   | 0.614355             |
|                | 1440614_at   | NM_021493    | 4933428G20Rik | 1.53                        | 0.00080682              | -1.1004                  | 0.505793             |
|                | 1450816_at   | NM_015810    | Polg2         | 1.54                        | 0.0261729               | 1.3182                   | 0.313186             |
|                | 1416041_at   | NM_011361    | Sgk1          | 1.55                        | 0.0117658               | 1.136                    | 0.591063             |
|                | 1416896_at   | NM_009097    | Rps6ka1       | 1.57                        | 0.00550452              | 1.111                    | 0.557733             |
|                | 1450364_a_at | NM_134248    | Havcr1        | 1.59                        | 0.0223734               | 1.6582                   | 0.273444             |
|                | 1420185_at   | NM_138744    | Ssx2ip        | 1.76                        | 0.00669644              | -1.6256                  | 0.13017              |
|                | 1447966_a_at | NM_177670    | Tmem69        | 1.83                        | 0.0313526               | -1.0774                  | 0.822957             |
|                | 1430357_at   | NM_008211    | H3f3b         | 1.87                        | 0.00427678              | 2.105                    | ND                   |
|                | 1447854_s_at | NM_178214    | Hist2h2be     | 1.95                        | 0.00999838              | 4.139                    | ND                   |
|                | 1417491_at   | NM_007798    | Ctsb          | 1.96                        | 0.00888385              | -1.1478                  | 0.590946             |

Supplemental Table 1

|                | ProbeSet ID       | Accession#          | Gene Symbol   | Fold Change<br>(Microarray) | p-value<br>(Microarray) | Fold Change<br>(qRT-PCR) | p-value<br>(qRT-PCR) |
|----------------|-------------------|---------------------|---------------|-----------------------------|-------------------------|--------------------------|----------------------|
| <b>24 Hour</b> | 1417491_at        | NM_007798           | Ctsb          | 1.96                        | 0.00888385              | 2.378                    | ND                   |
|                | 1454254_s_at      | NM_029639           | 1600029D21Rik | 2.01                        | 0.0271417               | -9908944.781             | 0.146438             |
|                | 1435382_at        | NM_010882           | Ndn           | 2.06                        | 0.0423586               | -1.4904                  | 0.000498             |
|                | 1422327_s_at      | NM_008062           | G6pdx         | 2.12                        | 0.00679112              | 2.4902                   | 0.13793              |
|                | <b>1437842_at</b> | <b>NM_207279</b>    | <b>Plcx1</b>  | <b>2.13</b>                 | <b>0.0487732</b>        | <b>2.3004</b>            | <b>0.010372</b>      |
|                | 1457724_at        | NM_009984           | Ctsl          | 2.18                        | 3.88E-04                | -1.284                   | 0.058499             |
|                | 1417273_at        | NM_013743           | Pdk4          | 2.36                        | 0.0270769               | 1.1888                   | 0.452556             |
|                | 1417273_at        | NM_013743           | Pdk4          | 2.36                        | 0.0270769               | 4.366                    | ND                   |
|                | <b>1448354_at</b> | <b>NM_008062</b>    | <b>G6pdx</b>  | <b>2.72</b>                 | <b>1.46E-05</b>         | <b>2.6259</b>            | <b>0.040872</b>      |
|                | 1424752_x_at      | XM_620861           | Zfp71         | 2.98                        | 0.0021718               | -1.1017                  | 0.641135             |
|                | <b>1441793_at</b> | <b>NM_001099632</b> | <b>Rnf39</b>  | <b>3.44</b>                 | <b>0.016834</b>         | <b>1.8708</b>            | <b>0.034122</b>      |
